# Supplementary material for: Oral administration of sea cucumber (Stichopus japonicus) protein exerts wound healing effectsviathe PI3K/AKT/mTOR signaling pathway
Source: Royal Society of Chemistry journal article supplement (doi:10.1039/d2fo01372j), 2022-01-01

## Supporting Information

### **Oral administration of sea cucumber (*Stichopus japonicus*) protein exerts the wound healing via PI3K/AKT/mTOR signaling pathway**

Jing-He Sun, <sup>a</sup> Shuang Song, <sup>a</sup> Jing-Feng Yang <sup>\*a</sup>

*<sup>a</sup> School of Food Science and Technology, Dalian Polytechnic University, National  
Engineering Research Center of Seafood, Dalian 116034, P. R. China*

\*Corresponding author: Dr. Jingfeng Yang, School of Food Science and Technology, Dalian  
Polytechnic University, No.1 Qinggongyuan, Ganjingzi district, Dalian 116034, P.R.China  
Tel: +86-411-86323262, Fax: +86-411-86323262. E-mail address: yjfgo@163.com

## Supplementary Figure

**Table S1: The SDS-PAGE electrophoretic analysis of dSCP.**

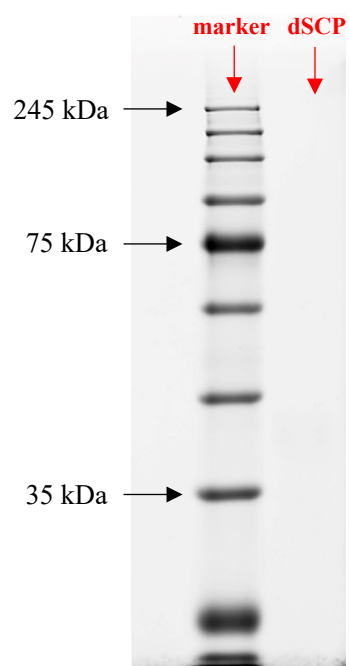

## Supplementary Figure

The SDS-PAGE electrophoretic analysis of SCP (Fig. 1B).

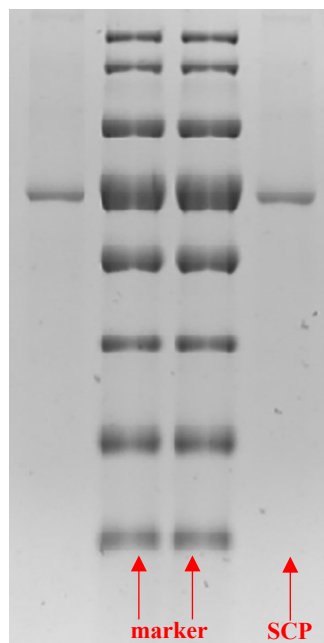

**Effects of dSCP on PI3K/AKT/mTOR signaling pathway in HaCaT cell. (Fig. 7).**

$\beta$ -actin

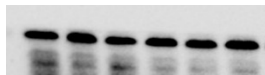

AKT

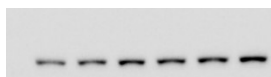

PI3K

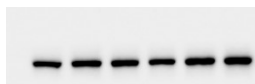

mTOR

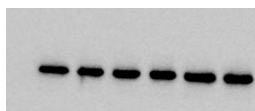

p-AKT

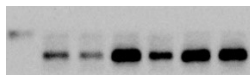

p-PI3K

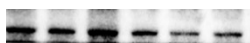

p-mTOR

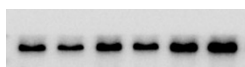

Supplement: d2fo01372j1.pdf [file d2fo01372j1.pdf]
